# Supplementary material
Source: Preprints.org preprint supplement (doi:10.20944/preprints202009.0639.v1)
Supplement: Supplementary file 1 [file Supplmentary tables(1).xlsx]

## Sheet: Table S1
Table S1. Primer pairs of drought-tolerant maker genes for RT-qPCR analysis
Maker Genes	Primer sequence (5' to 3')
btg-26	F: GTGTCATCACAGCGTTTAACTT
	R: CTATTGCTTCACCAATCTCAGC
P5CS2	F: TCAGGCTTTGTCTTCAGAAGAT
	R: CAGGCTTCATAACTAAACGAGC
BADH	F: GTATTGTGTGGGTCAACTGTTC
	R: CATCCCCATGGTTCATCAGATA
ADC2	F: GATTTGACGTGTGATAGTGACG
	R: CCCACCAAACAAATTATGCACT

## Sheet: Table S2
Table S2. Normal distribution test of four WLR data sets
	Kolmogorov-Smirnova			Shapiro-Wilk
	Statistic	df	Sig.	Statistic	df	Sig.
WLR1	0.054	258	0.07	0.951	258	0.0001
WLR2	0.044	258	0.2	0.964	258	0.0001
WLR3	0.082	258	0	0.956	258	0.0001
WLR4	0.074	258	0.001	0.958	258	0.0001

## Sheet: Table S3
Table S3. Variance homogeneity test of two time period WLR data
Phenotypic data	Levene Statistic	degrees of freedom 1	degrees of freedom 2	Significance
0-24 hrs	0.137	1	520	0.711
0-48 hrs	0.091	1	520	0.763

## Sheet: Table S4
Table S4. Information of 14 selected accessions for drought stress treatment
Accessions	Resequencing No.	Accession No. in ZJU	Name	Origin	Vernalization type
LWLR1	R4743	696	Velox	Netherlands	winter
LWLR2	R4748	705	Marana	Netherlands	winter
LWLR3	R4191	38	Danska	Czechoslovakia	winter
LWLR4	R4749	706	Ramon	Netherlands	winter
LWLR5	R4810	767	Mah 232	Poland	winter
LWLR6	R4762	719	Winfred	Netherlands	winter
LWLR7	R4635	585	Me 6	German Democratic Republic	winter
LWLR8	R4758	715	Viva	Netherlands	winter
HWLR1	R5017	975	Narowal-D1	Pakistan	semi-winter
HWLR2	R4239	92	Golden	Canada	spring
HWLR3	R4698	649	Cima rapa	Italy	spring
HWLR4	R4229	78	Wesbrook	Australia	spring
HWLR5	R4316	175	Orpal, Crop	France	spring
HWLR6	R4440	356	Lisonne	Germany	spring

## Sheet: Table S5
Table S5. Summary of SNPs significant associatied with WLR trait. The SNP position with green shading is the result of repeated detection
Phenotypic data set	chr	snp_location	-log10P
	A01	653580	5.4832
	A01	3134573	5.61134
	A03	14478910	5.16435
	A06	22010337	5.00047
	A06	22010357	5.46807
	A06	4311099	5.76111
	A09	17963237	5.14703
	A10	15190173	5.01562
	A10	14931026	5.02627
	A10	14862792	5.05207
	A10	15044932	5.05363
	A10	14847542	5.08276
	A10	14928251	5.08814
	A10	14847542	5.091
	A10	15188219	5.12059
	A10	14971611	5.14137
	A10	14871314	5.15707
	A10	14963221	5.1637
	A10	14861065	5.16796
	A10	14861768	5.17357
	A10	14861758	5.18446
	A10	14886966	5.23073
	A10	14967562	5.23715
	A10	14863060	5.25019
	A10	14886972	5.25834
	A10	14887111	5.272
	A10	14870326	5.28673
	A10	14880595	5.30716
	A10	14865349	5.32414
	A10	15048757	5.36697
	A10	15110449	5.48995
	A10	3579769	5.54965
	A10	14964201	5.57523
	A10	14964221	5.57523
	A10	14511080	5.58709
	A10	15046359	5.64888
	A10	14985169	5.66356
	A10	15059166	5.70871
	A10	14797332	5.73315
	A10	10510902	5.75278
	A10	14871092	5.76143
	A10	14887378	5.82779
WLR of 0 to 24 hours	A10	15043930	5.95872
	A10	15043924	5.99015
	A10	14518988	6.07649
	A10	15040248	6.08134
	A10	14797339	6.11859
	A10	14967680	6.18669
	A10	14865349	6.32849
	A10	14863060	7.21019
	A10	15046760	7.21181
	C01	17981689	5.01465
	C02	38342709	5.00422
	C02	37545772	5.07318
	C03	1523221	5.18017
	C03	26203830	5.21078
	C03	26172966	5.25284
	C03	51438105	5.44087
	C04	2573803	5.02539
	C05	26082633	5.22085
	C07	38148853	5.12038
	C07	38097153	5.3278
	C07	38082809	5.45575
	C08	12521977	5.03705
	C09	45877689	5.13269
	C09	46437584	5.13571
	C09	46085845	5.14659
	C09	45877712	5.15491
	C09	46085853	5.27522
	C09	46221003	5.32039
	C09	46270880	5.32251
	C09	29868881	5.37786
	C09	29868881	5.58152
	C09	46085860	5.68634
	C09	46221003	6.19096
	C09	46270880	6.29843
	C09	46268778	6.38282
	C09	46268738	6.57524
	A01	653580	5.16476
	A01	848352	5.14645
	A02	11157936	5.10635
	A02	11157945	5.05405
	A03	4101020	5.44404
	A06	4311099	5.1091
	A06	22010357	5.25302
	A07	20063318	5.31979
	A08	14996340	5.09589
	A08	14996340	5.32874
	A09	30814266	5.08928
	A10	4948281	5.15654
	A10	14865349	5.56889
	A10	14886966	5.19887
	A10	14886972	5.33175
	A10	4948281	5.24057
	A10	14511080	5.76971
	A10	14797339	5.08549
	A10	14865370	5.10625
	A10	14887111	5.32786
	A10	14887378	5.44586
	A10	14964201	5.20684
	A10	14964221	5.20684
	A10	14967562	5.12979
	A10	14967680	5.3757
	A10	14967697	5.72309
	A10	15040248	5.63777
	A10	15044932	5.84901
	A10	15046359	5.20924
	A10	15054346	5.17269
	A10	15059166	5.99487
WLR of 0 to 48 hours	A10	15110449	5.57587
	A10	15164564	5.23914
	A10	15190173	5.75189
	A10	10510902	6.09941
	A10	14518988	6.30275
	A10	14863060	6.72251
	A10	14865349	6.75344
	A10	15043924	6.06316
	C01	22810393	5.26655
	C01	17981689	5.17713
	C02	38555510	5.02353
	C03	26172966	5.03431
	C03	1523221	5.14078
	C03	51438105	5.8164
	C04	7373181	5.20791
	C04	44834716	5.46216
	C07	38148853	5.09073
	C07	44110060	5.83148
	C09	29868881	5.67957
	C09	45877712	5.19578
	C09	46085853	5.01709
	C09	46085860	5.83124
	C09	46221003	5.05127
	C09	46051258	5.15836
	C09	46051842	5.2
	C09	46268778	5.76452
	C09	46268803	5.88352
	C09	46652206	5.43351
	C09	46221003	6.20169
	C09	46270880	6.7098

## Sheet: Table S6
Table S6. Trancriptional expression data of 4 candidate genes in drought stress treatment
Gene ID	Name	Tissue	Condition	Treatment Group	Treatment Reagent	Treatment time	FPKM	TPM
BnaA10g21010D	BnaA10.PNTH	seedling leaf	greenhouse	control	NA	24h	30.8633	35.849
		seedling leaf	greenhouse	test		24h	39.731	38.732
BnaA10g21040D	BnaA10.PsbP	seedling leaf	greenhouse	control	NA	24h	36.099	38.9053
		seedling leaf	greenhouse	test	drought	24h	49.898	44.453
BnaC09g46240D	BnaC09.MATE	seedling leaf	greenhouse	control	NA	24h	42.4897	42.9743
		seedling leaf	greenhouse	test	drought	24h	89.6865	74.9275
BnaC09g46300D	BnaC09.EMB3010	seedling leaf	greenhouse	control	NA	24h	59.2773	69.6133
		seedling leaf	greenhouse	test	drought	24h	74.819	73.5275
BnaA10g21880D	BnaA10.Histone	seedling leaf	greenhouse	control	NA	24h	13.1943	16.113
		seedling leaf	greenhouse	test	drought	24h	8.893	8.758
BnaC09g46270D	BnaC09.Histone	seedling leaf	greenhouse	control	NA	24h	13.6493	55.967
		seedling leaf	greenhouse	test	drought	24h	10.3815	44.9825
